# Supplementary material for: High-throughput growth of HfO2 films using temperature-gradient laser chemical vapor deposition
Source: Royal Society of Chemistry journal article supplement (doi:10.1039/d2ra01573k), 2022-01-01
Supplement: d2ra01573k1.pdf [file d2ra01573k1.pdf]

## Supporting Information

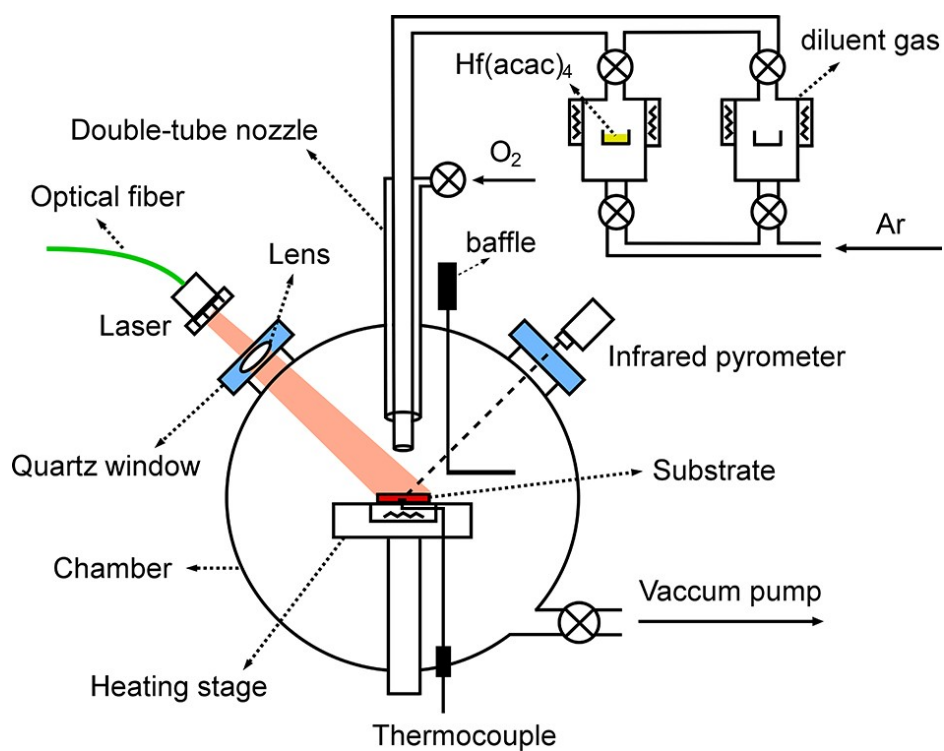

Fig. S1. The schematic of the HT-LCVD apparatus.

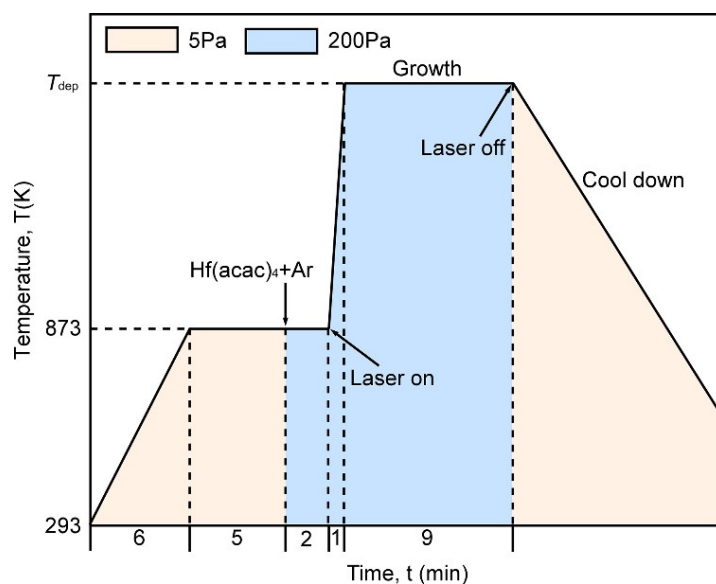

Fig. S2. A diagram showing the evolution of temperature in  $\text{HfO}_2$  films grown using HT-LCVD.

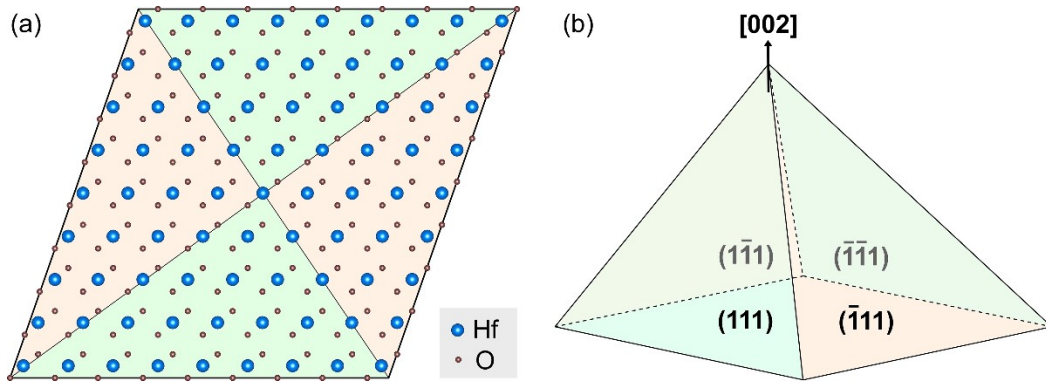

Fig. S3. A schematic model for the growth of  $\langle 002 \rangle$ -oriented grains in Region II showing (a) atomic nodes and (b) exposed surface.

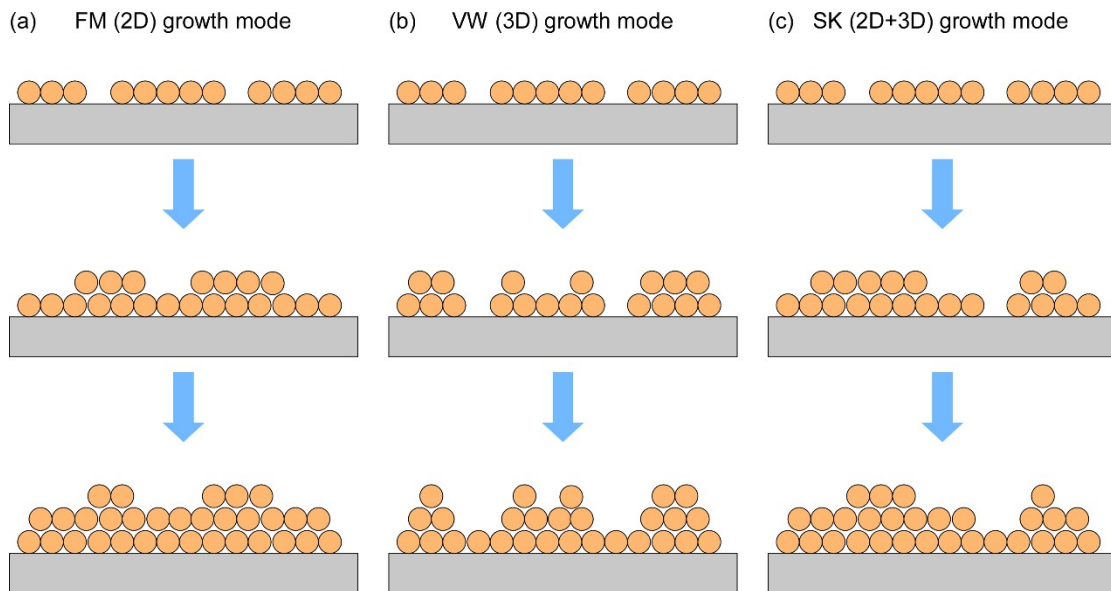

Fig. S4. The schematics of FM, VW, and SK growth models.

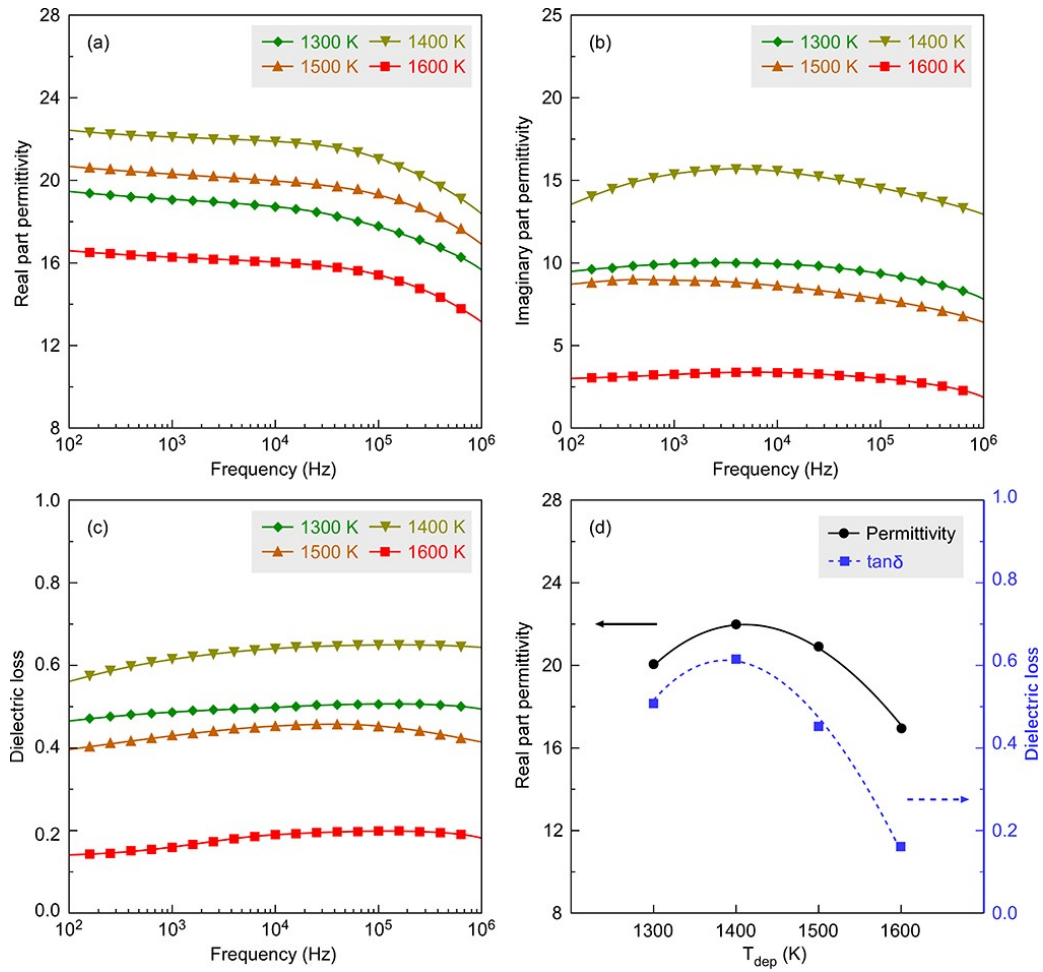

Fig. S5. The dielectric measurements of HfO<sub>2</sub> films in different regions, as the (a) real part permittivity, (b) imaginary part permittivity, (c) dielectric loss ( $\tan\delta$ ), and (d) variation chart of permittivity and dielectric loss.
